# Supplementary material for: The follicle epithelium in the Drosophila ovary is maintained by a small number of stem cells
Source: eLife. 2019 Dec 18;8:e49050. doi: 10.7554/eLife.49050 (PMC6946398; doi:10.7554/eLife.49050)
Supplement: Figure 1—source data 1. [file elife-49050-fig1-data1.csv]

	1 color	2 colors	3 colors	4 colors	5 colors	6 colors	Total
5dphs	3	10	5	0	0	0	18
7dphs	18	48	21	4	0	0	91
9dphs	6	29	7	1	0	0	43
12 dphs	26	10	0	0	0	0	36
14dphs	10	3	2	0	0	0	15
20 dphs	22	7	0	0	0	0	29
25 dphs	6	4	0	0	0	0	10
Total	91	111	35	5	0	0	242
