# Supplementary material for: The follicle epithelium in the Drosophila ovary is maintained by a small number of stem cells
Source: eLife. 2019 Dec 18;8:e49050. doi: 10.7554/eLife.49050 (PMC6946398; doi:10.7554/eLife.49050)
Supplement: Figure 1—source data 2. [file elife-49050-fig1-data2.csv]

	study	one	two	three	four	five	six
1	Fadiga	14	67	16	3	0	0
2	Reilein	2	12	44	30	8	4
