# Supplementary material for: The follicle epithelium in the Drosophila ovary is maintained by a small number of stem cells
Source: eLife. 2019 Dec 18;8:e49050. doi: 10.7554/eLife.49050 (PMC6946398; doi:10.7554/eLife.49050)
Supplement: Figure 1—source data 3. [file elife-49050-fig1-data3.csv]

dphs	Gen1	Gen2	Gen3
d9	19	15	2
d14	15	7	0
