# Supplementary material for: The follicle epithelium in the Drosophila ovary is maintained by a small number of stem cells
Source: eLife. 2019 Dec 18;8:e49050. doi: 10.7554/eLife.49050 (PMC6946398; doi:10.7554/eLife.49050)
Supplement: Figure 2—source data 1. [file elife-49050-fig2-data1.csv]

	Genotype	No_clones	FSC	Transient
1	MultiColor	0.5172413793	0.3275862069	0.1551724138
2	MultiColor	0.6585365854	0.1219512195	0.2195121951
3	MultiColor	0.5070422535	0.2535211268	0.2394366197
4	GFPneg	1	0	0
5	GFPneg	0.9827586207	0.01724137931	0
6	GFPneg	0.9523809524	0.01904761905	0.02857142857
