# Supplementary material for: The follicle epithelium in the Drosophila ovary is maintained by a small number of stem cells
Source: eLife. 2019 Dec 18;8:e49050. doi: 10.7554/eLife.49050 (PMC6946398; doi:10.7554/eLife.49050)
Supplement: Figure 3—source data 1. [file elife-49050-fig3-data1.csv]

	dphs	W	P	B	T	G	Y
1	Expected	0.222	0.222	0.111	0.222	0.111	0.111
2	d5	0.487804878	0.341463415	0.097560976	0.073170732	0	0
3	d7	0.492610837	0.325123153	0.044334975	0.0591133	0.024630542	0.054187192
4	d9	0.473684211	0.389473684	0.063157895	0.052631579	0.010526316	0.010526316
5	d14	0.4	0.4	0.1	0	0	0.1
