# Supplementary material for: The follicle epithelium in the Drosophila ovary is maintained by a small number of stem cells
Source: eLife. 2019 Dec 18;8:e49050. doi: 10.7554/eLife.49050 (PMC6946398; doi:10.7554/eLife.49050)
Supplement: Figure 3—source data 2. [file elife-49050-fig3-data2.csv]

dphs	W	P	B	T	G	Y
d9	0.454545455	0.290909091	0.036363636	0.036363636	0	0.181818182
d14	0.620689655	0.206896552	0	0	0	0.172413793
