# Supplementary material for: The follicle epithelium in the Drosophila ovary is maintained by a small number of stem cells
Source: eLife. 2019 Dec 18;8:e49050. doi: 10.7554/eLife.49050 (PMC6946398; doi:10.7554/eLife.49050)
Supplement: Figure 4—source data 1. [file elife-49050-fig4-data1.csv]

	experiment	none	mosaic	full
1	d730min	214	27	2
2	d7_4x	76	35	4
3	d14_4x	54	19	10
4	MARCM19A	49	33	3
