# Supplementary material for: The follicle epithelium in the Drosophila ovary is maintained by a small number of stem cells
Source: eLife. 2019 Dec 18;8:e49050. doi: 10.7554/eLife.49050 (PMC6946398; doi:10.7554/eLife.49050)
Supplement: Figure 4—source data 2. [file elife-49050-fig4-data2.csv]

	d7x30	d7	d14	MARCM19A
1	0.407035176	0.526315789	0.431578947	0.494791667
2	0.449704142	0.545454545	0.333333333	0.568627451
3	0.648351648	0.398832685	0.772079772	0.403508772
4	0.44820296	0.317829457	0.754143646	0.404840484
5	0.642857143	0.44516129	0.669181034	0.364788732
6	0.585714286	0.470967742	0.577903683	0.351851852
7	0.258865248	0.64028777	0.347133758	0.382879377
8	0.649122807	0.411764706	0.398809524	0.454356846
9	0.469072165	0.325342466	0.882911392	0.36875
10	0.264044944	0.428057554	0.503623188	0.486486486
11	NA	0.579651941	0.426356589	0.552422907
12	NA	0.619195046	0.502688172	0.339449541
13	NA	0.295081967	0.514792899	0.497291441
14	NA	0.653061224	0.399463807	0.458100559
15	NA	0.436123348	0.61023622	0.43081761
16	NA	0.544117647	0.439490446	0.43622449
17	NA	0.275510204	0.566985646	0.419689119
18	NA	0.507109005	0.33030853	0.298378378
19	NA	0.287671233	0.502941176	0.472295515
20	NA	0.442857143	0.82373678	0.646017699
21	NA	0.530791789	0.378172589	0.542079208
22	NA	0.344768439	0.228624535	0.679824561
23	NA	0.46875	0.80362117	0.314152411
24	NA	0.574468085	0.238955823	0.263157895
25	NA	0.658008658	0.515885023	0.5375
26	NA	0.558035714	0.390804598	NA
27	NA	0.520408163	NA	NA
28	NA	0.445482866	NA	NA
29	NA	0.163987138	NA	NA
30	NA	0.636363636	NA	NA
31	NA	0.708045977	NA	NA
32	NA	0.257575758	NA	NA
33	NA	0.658385093	NA	NA
34	NA	0.757437071	NA	NA
35	NA	0.626907074	NA	NA
36	NA	0.590540541	NA	NA
37	NA	0.455621302	NA	NA
38	NA	0.585448393	NA	NA
39	NA	0.47148289	NA	NA
40	NA	0.6	NA	NA
41	NA	0.508196721	NA	NA
42	NA	0.665271967	NA	NA
43	NA	0.27826087	NA	NA
44	NA	0.7239819	NA	NA
45	NA	0.642156863	NA	NA
